# Supplementary material
Source: publisher figshare collection journal article supplement (https://gsapubs.figshare.com/ndownloader/files/23293493)
Supplement: Supplementary file 1 [file 23293493]

## Appendix DR1. Radiocarbon Dates

Table DR1. Radiocarbon Ages from Sand Cay Materials, Reef Core and Reef Flat Samples, Bewick Island, Great Barrier Reef, Australia.

| Lab code  | Island sample location | Sample material                         | Depth relative to MSL (m) | Conventional age (yr B.P.) | Calibrated age range (95.4% probability) (cal. yr B.P.) |
|-----------|------------------------|-----------------------------------------|---------------------------|----------------------------|---------------------------------------------------------|
| Wk-17636  | T2 C 1                 | Calcareous sand                         | 2.36                      | 4,608 ± 42                 | 4,570-4,880                                             |
| Wk-24023  | T2 C 1                 | Calcareous sand                         | 1.38                      | 4,434 ± 42                 | 4,390-4,720                                             |
| Wk-17630  | T2 C 1                 | <i>In situ</i> coral <i>Porites</i>     | 0.09                      | 6,037 ± 45                 | 6,270-6,530                                             |
| Wk-17637  | T2 C 2                 | Calcareous sand                         | 2.28                      | 4,525 ± 44                 | 4,500-4,810                                             |
| Wk-24024  | T2 C 2                 | Calcareous sand                         | -0.10                     | 4,585 ± 41                 | 4,560-4,850                                             |
| Wk-17631  | T2 C 2                 | <i>In situ</i> coral <i>Favid</i>       | -0.27                     | 6,044 ± 45                 | 6,280-6,540                                             |
| Wk-17638  | T2 C 3                 | Calcareous sand                         | 2.98                      | 4,605 ± 41                 | 4,570-4,870                                             |
| Wk-17635  | T2 C 3                 | Calcareous sand                         | 0.18                      | 4,646 ± 42                 | 4,640-4,960                                             |
| Wk-17632  | T2 C 3                 | <i>In situ</i> coral <i>Porites</i>     | -0.24                     | 5,619 ± 44                 | 5,840-6,150                                             |
| Wk-17639  | T2 C 4                 | Calcareous sand                         | 2.05                      | 3,838 ± 40                 | 3,580-3,870                                             |
| Wk-24025  | T2 C 4                 | Beachrock                               | 1.67                      | 4,024 ± 40                 | 3,830-4,130                                             |
| Wk-17640  | T2 C 5                 | Calcareous sand                         | 0.95                      | 1,606 ± 47                 | 970-1,250                                               |
| Wk-24026  | T2 C 5                 | Coral shingle                           | -0.32                     | 4,937 ± 43                 | 4,990-5,330                                             |
| *Wk-24027 | T2 C 6                 | Mangrove peat                           | -0.16                     | 110 ± 0.2                  | Modern                                                  |
| Wk-17633  | T2 C 6                 | <i>In situ</i> coral <i>Favid</i>       | -0.27                     | 5,553 ± 46                 | 5,720-6,020                                             |
| Wk-24028  | RF                     | <i>In situ</i> coral <i>Porites</i> FMA | -0.72                     | 5,270 ± 44                 | 5,450-5,700                                             |
| ANU-1559  | PA                     | Calcareous sand                         | 1.15                      | 4,380 ± 80                 | 4,200-4,800                                             |
| ANU-1387  | PA                     | Calcareous sand                         | 1.33                      | 2,950 ± 80                 | 2,380-2,850                                             |
| ANU-1386  | BR                     | <i>Tridacna</i> shell in BR             | -                         | 2,030 ± 70                 | 1,340-1,730                                             |
| ANU-1385  | RF P1                  | Coral <i>Platygyra</i> in SR            | -                         | 640 ± 70                   | Mod - 390                                               |
| ANU-1208  | RF P1                  | Coral in RR                             | -                         | 2,840 ± 70                 | 2,330-2,710                                             |
| ANU-1609  | RF P1                  | <i>Tridacna</i> shell in RR             | -                         | 2,040 ± 70                 | 1,350-1,740                                             |
| ANU-1608  | RF P2                  | <i>Tridacna</i> shell in SR             | -                         | 760 ± 65                   | 220-500                                                 |
| ANU-1284  | Drill 73               | Coral frags <i>Porites</i> sp.          | -3.7                      | 6,920 ± 130                | 7,100-7,650                                             |

*Note:* Radiocarbon dates obtained from the Radiocarbon Dating Laboratory, University of Waikato (Wk), New Zealand and Australian National University (ANU). Ages calibrated using OxCal version 3.10 (Bronk Ramsey, 2001) with marine data set (Hughen et al., 2004) and Delta-R of  $52 \pm 31$  as best estimate for northeast Australia. ANU dates from Polach et al. 1978. Sample location refers to: T = transect line, C = core, RF = reef flat, P = profile line, BR = beachrock, Drill = 1973 drill core. FMA = fossil microatoll, RR = cemented rampart rock, SR = non lithified shingle ridge. \*Wk-24027 was an AMS date on mangrove peat. Location of transects and reef samples shown in Figure 1.

## References

- Bronk Ramsey, C., 2001, Development of the radiocarbon program OxCal: Radiocarbon, v. 43, p. 355–363.
- Hughen K.A., et al. 2004, Marine 04 Marine Radiocarbon Age Calibration, 0-26 Cal KYr BP. Radiocarbon, v. 46, no. 3, p. 1059-1086.
- Polach, H.A., McLean R.F., Caldwell, J.R., Thom, B.G. 1978, Radiocarbon ages from the northern Great Barrier Reef: Philosophical Transactions of the Royal Society London, A, 291, p. 139-158.

**Figure DR1. Fossil Microatolls from Bewick Island**

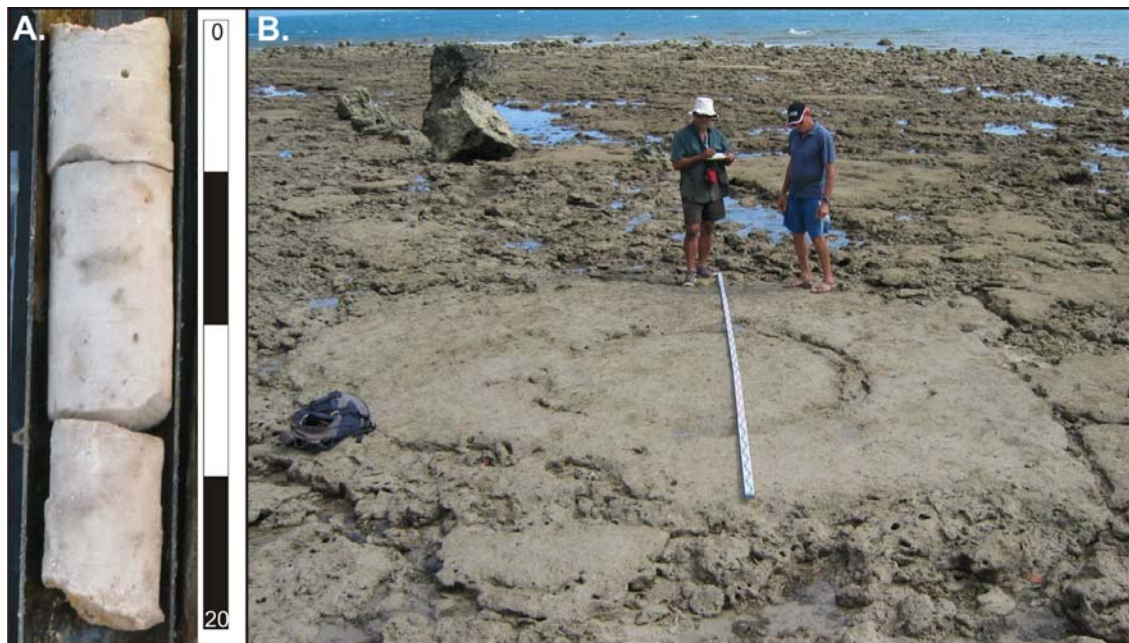

Figure DR1. A) Fossil *Porites* at base of core hole 1 beneath island sediments at depth +0.09 to -0.12 m relative to msl. Conventional age  $6,037 \pm 45$  cal yr BP. B) Fossil *Porites* microatoll exposed on contemporary reef flat, 50 m southwest of island. Microatoll 4.9 m diameter, elevation -0.72 m relative to msl, radiometric age 5,575 cal yr BP. Note additional microatolls in background.

Corals adopt the microatoll morphology when upward growth is constrained by prolonged subaerial exposure at low tide but lateral colony growth can continue (Smithers and Woodroffe, 2000). Corals at base of cores in holes through Bewick cay are interpreted as *in situ* fossil microatolls based on three characteristics: i) corallite orientation showed the primary growth axis was lateral; ii) the colonies were of comparable thickness (~20-40 cm) to fossil microatolls preserved on the surrounding reef flat (Fig. DR1 A, B); and iii) taphonomic traces of boring and encrustation preserved on the upper and lower surfaces suggested the material was *in situ* and upward coral growth was sea level constrained.

**Reference**

Smithers, S.G., and Woodroffe, C.D., 2000, Microatolls as sea level indicators on a mid-ocean atoll: *Marine Geology*, v. 168, p. 61-78.
